# Supplementary material
Source: publisher figshare collection journal article supplement (https://geolsoc.figshare.com/ndownloader/files/5424677)
Supplement: Supplementary file 1 [file 5424677]

Table DR1. Apatite fission track full data
Sample	N Latitude (deg.)	E.Longitude (deg)	Elev. (m)	Age/Lith.	Xlsa	Rho-Sb x106	NSc	Rho-Ib x105	NIc	P(?2)d %	RhoDe x106	NDf	Age (Ma)	�1?	Dparg mean	Dpar SD	# lengthsh	Length (?m)	Length SD (?m)	Analysti
Talas range
10TR02	42.163250	72.040472	2571	Pt/Ss	20	1.919	57	1.71	640	100	1.337	5231	22	3.1	2	0.15	104*	13.6	1.5	AB
10TR03	42.138222	72.040528	2678	Pt/Ss	20	1.37	122	1.291	1294	57	1.321	5231	23	2.3	2.05	0.18	2	15.4	0.4	AB
10TR04	42.108528	72.042611	3120	Pt/Ss	20	0.776	85	0.8	825	56	1.317	5231	25.4	2.9	1.98	0.18	5*	10.6	2.1	AB
10TR05	42.121972	72.037083	2921	Pt/Ss	20	1.242	72	1.345	665	97	1.258	5231	25.1	3.1	1.95	0.22	71*	11.7	2.1	AB
10TR17	42.458889	71.533806	1269	Pt/Ss	19	1.188	91	1.265	855	91	1.284	7234	25.2	2.80	1.92	0.26	13*	13.645	1.7	AB
Ugam Range
10UM12	42.233083	71.406694	3.456	C/Granite	18	3.275	438	7.042	2037	85	1.301	5674	51.5	2.8	2	0.16	101	12.8	1.5	AB
10UM14	42.240139	71.409833	2.082	C/Schist	7	3.127	87	3.598	756	50	1.286	5674	27.5	3.2	3	0.19	15	12.9	1.4	AB
10UM15	42.241528	71.413306	2.945	C/Granite	17	1.304	115	2.095	716	82	1.27	5674	37.6	3.8	2	0.26	9	12.2	1.5	AB
10CA26	41.886778	70.852194	3.161	C/Granite	8	1.406	103	2.546	569	83	1.228	5231	40.9	4.4	2	0.21	7	12.0	1.9	AB
10CA27	41.881278	70.853806	2.953	C/Granite	21	1.963	260	3.815	1338	84	1.218	5231	43.6	3	2	0.17	101*	11.8	1.9	AB
10CA29	41.874861	70.862750	2.535	C/Granite	19	2.433	197	3.286	1459	40	1.208	5231	30.1	2.3	2	0.15	106	11.5	1.8	AB
Shandalash Range
10TR19	42.199194	71.585583	2978	C/Granite	19	3.469	185	4.293	1495	68	1.307	5231	29.8	2.4	2	0.19	19	11.6	2.3	AB
10TR20	42.185528	71.574194	2815	C/Granite	20	0.599	70	0.686	611	97	1.297	5231	27.4	3.5	2.05	0.17	13*	11.8	2.0	AB
10TR21	42.183722	71.569722	2778	?/Tillite	20	3.266	266	3.368	2579	97	1.287	5231	24.5	2.6	2.17	0.19	49	12.2	2.4	AB
10TR22	42.128722	71.557611	2458	?/Tillite	19	1.27	135	1.389	1234	8	1.278	5231	26.4	2.9	2.82	0.47	28*	11.6	2.6	AB
10TR23	42.119528	71.546611	2.713	Dev/Ss	17	1.75	53	0.824	1126	96	1.268	5231	11	1.6	2	0.21	4	13.0	2.4	AB
Chatkal Range
10CK34	41.574028	70.699361	1.763	C/Granite	20	1.783	865	9.479	1627	5	1.298	7234	124.3	6.6	2.07	0.21	101*	12.8	1.5	AB
10CK37	41.496722	71.023611	1.762	C/Granite	20	1.288	249	2.932	1094	61	1.277	7234	53.6	3.8	2.11	0.19	56	12.1	1.9	AB
10CK41	41.437833	71.226806	1.369	Pz1/Gneiss	20	1.831	609	9.595	1162	35	1.248	5231	119.7	6.7	2.19	0.16	105*	11.7	1.9	AB
10CK43	41.584250	71.526972	1.874	Dev/Ss	16	1.081	108	2.372	492	100	1.264	7234	51	5.5	2.22	0.26	14*	12.5	1.7	AB
10CK44	41.565833	71.529167	1.695	Dev/Ss	20	1.326	241	3.751	852	65	1.238	5231	64.7	5	2.50	0.36	37*	12.2	2.1	AB
Fergana range
10SU67	41.530639	72.331833	0.922	Dev/Ss	7	0.667	13	0.667	130	100	1.041	7234	19.2	5.6	2.28	0.19	ND	ND	ND	AB
10SU65	41.612972	72.364083	2.578	Dev/Ss	20	0.922	137	0.931	1356	84	1.118	7234	20.8	1.9	2.30	0.17	101*	13.2	1.4	AB
10SU61	41.590000	72.328639	1.985	C/Granite	20	0.831	92	0.632	1209	7	1.131	7234	16.4	2	1.87	0.17	100*	11.6	1.9	AB
10SU62	41.609194	72.356056	2.386	C/Granite	20	1.082	157	1.144	1365	91	1.125	7234	23.9	2.1	2.31	0.02	101*	13.2	1.7	AB
10SU64	41.622861	72.367583	2.767	Dev/Granite	19	1.23	334	2.528	1625	50	1.136	4999	43	2.7	2.53	0.14	105*	12.4	1.9	AB
a Xls is the number of individual crystals dated.
b Rho-S and Rho-I are spontaneous and induced track density; both measured in (tracks/cm2).
c NS and NI are the number of spontaneous and induced tracks counted, respectively.
d P(?2) (%) is the chi-squred probability [Galbraith, 1981; Green, 1981]. All ages pass the P(?2) test and are reported as pooled ages.
e Rho-D is the induced track density in external detector adjacent to CN5 dosimetry glass (tracks/cm2).
f ND is the number of tracks counted in determining Rho-D.
g Mean of at least four Dpar measurements. The correction factor [Sobel and Seward, 2010] is 0.89 with respect to the Durango apatite standard [Donelick et al., 1999].
h Samples with asterisk (*) indicates track lengths measured from heavy ions irradiation slide.
i Zeta calibration used for apatite: AB: 369.5 � 7.9 (A. Bande, unpublished, 2012)
